# Supplementary material for: The association of Minerals Intake in Three Meals with Cancer and All-Cause Mortality: The U.S. National Health and Nutrition Examination Survey, 2003-2014
Source: Research Square preprint supplement (doi:10.21203/rs.3.rs-215291/v1), 2021-02-17
Supplement: Supplementary file 1 [file 0872c8fdc34228b1179d5c0e.docx]

**Supplementary table 4** Adjusted HRs for the differences in minerals intake between dinner and breakfast and cancer and all-cause mortality with additionally excluding those having mineral supplements.

|  | Cancer mortality | | All-cause mortality | |
| --- | --- | --- | --- | --- |
|  | Case/N | HR (95%CI) | Case/N | HR (95%CI) |
| **Potassium (breakfast)** | |  |  |  |
| Q1 | 87/4767 | 1 | 348/4767 | 1 |
| Q2 | 103/4751 | 0.92(0.69-1.23) | 456/4751 | 1.03(0.89-1.19) |
| Q3 | 104/4760 | 0.78(0.59-1.05) | 477/4760 | 0.92(0.80-1.07) |
| Q4 | 125/4751 | 0.89(0.67-1.18) | 563/4751 | 1.01(0.88-1.17) |
| Q5 | 111/4750 | 0.79(0.59-1.06) | 509/4750 | 0.93(0.81-1.08) |
| *P* for trend |  | 0.143 |  | 0.336 |
| **Potassium (lunch)** | |  |  |  |
| Q1 | 117/4757 | 1 | 518/4757 | 1 |
| Q2 | 122/4758 | 1.11(0.85-1.43) | 515/4758 | 1.06(0.94-1.20) |
| Q3 | 110/4758 | 0.99(0.76-1.30) | 477/4758 | 1.03(0.91-1.18) |
| Q4 | 81/4751 | 0.71(0.53-0.96) | 408/4751 | 0.89(0.77-1.02) |
| Q5 | 100/4755 | 0.92(0.69-1.22) | 435/4755 | 1.03(0.90-1.18) |
| *P* for trend |  | 0.079 |  | 0.464 |
| **Potassium (dinner)** | |  |  |  |
| Q1 | 127/4757 | 1 | 550/4757 | 1 |
| Q2 | 101/4760 | 0.76(0.58-0.99) | 488/4760 | 0.89(0.79-1.01) |
| Q3 | 99/4751 | 0.74(0.56-0.97) | 443/4751 | 0.83(0.73-0.95) |
| Q4 | 99/4756 | 0.68(0.51-0.90) | 438/4756 | 0.82(0.71-0.94) |
| Q5 | 104/4755 | 0.70(0.52-0.94) | 434/4755 | 0.85(0.73-0.98) |
| *P* for trend |  | 0.015 |  | 0.009 |
| **Calcium (breakfast)** | |  |  |  |
| Q1 | 85/3999 | 1 | 367/3999 | 1 |
| Q2 | 101/3961 | 1.00(0.75-1.35) | 370/3961 | 0.86(0.74-1.00) |
| Q3 | 85/3985 | 0.75(0.55-1.02) | 455/3985 | 0.90(0.78-1.04) |
| Q4 | 111/3976 | 0.95(0.71-1.28) | 497/3976 | 0.93(0.81-1.08) |
| Q5 | 87/3973 | 0.84(0.61-1.15) | 436/3973 | 0.92(0.79-1.07) |
| *P* for trend |  | 0.309 |  | 0.760 |
| **Calcium (lunch)** | |  |  |  |
| Q1 | 109/3980 | 1 | 463/3980 | 1 |
| Q2 | 104/3992 | 0.96(0.76-1.31) | 457/3992 | 1.05(0.92-1.20) |
| Q3 | 95/3967 | 0.89(0.67-1.18) | 412/3967 | 0.98(0.85-1.12) |
| Q4 | 83/3980 | 0.83(0.61-1.12) | 417/3980 | 1.02(0.88-1.17) |
| Q5 | 78/3975 | 0.85(0.62-1.16) | 376/3975 | 1.06(0.92-1.23) |
| *P* for trend |  | 0.119 |  | 0.717 |
| **Calcium (dinner)** | |  |  |  |
| Q1 | 119/3985 | 1 | 516/3985 | 1 |
| Q2 | 97/3981 | 0.82(0.62-1.08) | 437/3981 | 0.90(0.79-1.03) |
| Q3 | 100/3977 | 0.80(0.60-1.05) | 449/3977 | 0.92(0.81-1.06) |
| Q4 | 87/3975 | 0.69(0.52-0.93) | 385/3975 | 0.80(0.69-0.92) |
| Q5 | 66/3976 | 0.59(0.43-0.83) | 338/3976 | 0.79(0.68-0.92) |
| *P* for trend |  | 0.001 |  | 0.000 |
| **Magnesium (breakfast)** | |  |  |  |
| Q1 | 93/5028 | 1 | 389/5028 | 1 |
| Q2 | 105/4910 | 0.88(0.66-1.17) | 445/4910 | 0.88(0.76-1.02) |
| Q3 | 119/4675 | 0.92(0.69-1.22) | 527/4675 | 1.01(0.88-1.16) |
| Q4 | 114/4653 | 0.83(0.62-1.10) | 521/4653 | 0.92(0.80-1.06) |
| Q5 | 99/4513 | 0.78(0.58-1.06) | 471/4513 | 0.90(0.78-1.04) |
| *P* for trend |  | 0.123 |  | 0.552 |
| **Magnesium (lunch)** | |  |  |  |
| Q1 | 119/4777 | 1 | 532/4777 | 1 |
| Q2 | 119/4873 | 1.07(0.83-1.39) | 540/4873 | 1.09(0.96-1.23) |
| Q3 | 113/4796 | 1.01(0.78-1.32) | 472/4796 | 0.98(0.86-1.12) |
| Q4 | 92/4731 | 0.81(0.61-1.08) | 437/4731 | 0.98(0.85-1.12) |
| Q5 | 87/4602 | 0.90(0.67-1.21) | 372/4602 | 1.00(0.86-1.15) |
| *P* for trend |  | 0.186 |  | 0.634 |
| **Magnesium (dinner)** | |  |  |  |
| Q1 | 135/4786 | 1 | 592/4786 | 1 |
| Q2 | 105/4843 | 0.75(0.58-0.98) | 505/4843 | 0.88(0.78-1.00) |
| Q3 | 100/4752 | 0.71(0.54-0.93) | 456/4752 | 0.83(0.73-0.95) |
| Q4 | 93/4744 | 0.67(0.50-0.89) | 422/4744 | 0.81(0.71-0.93) |
| Q5 | 97/4654 | 0.72(0.53-0.97) | 378/4654 | 0.82(0.71-0.96) |
| *P* for trend |  | 0.019 |  | 0.004 |
| **Copper (breakfast)** | |  |  |  |
| Q1 | 68/4253 | 1 | 320/4253 | 1 |
| Q2 | 123/5145 | 1.15(0.85-1.56) | 510/5145 | 0.93(0.80-1.07) |
| Q3 | 133/5105 | 1.10(0.81-1.49) | 584/5105 | 0.95(0.82-1.09) |
| Q4 | 123/5151 | 0.99(0.73-1.36) | 599/5151 | 0.95(0.83-1.10) |
| Q5 | 73/2927 | 1.10(0.77-1.56) | 296/2927 | 0.91(0.76-1.07) |
| *P* for trend |  | 0.842 |  | 0.438 |
| **Copper (lunch)** | |  |  |  |
| Q1 | 68/2490 | 1 | 287/2490 | 1 |
| Q2 | 97/3952 | 1.00(0.73-1.37) | 431/3952 | 1.05(0.90-1.22) |
| Q3 | 146/6007 | 1.04(0.77-1.40) | 622/6007 | 1.06(0.92-1.23) |
| Q4 | 123/6210 | 0.79(0.58-1.08) | 619/6210 | 0.99(0.85-1.14) |
| Q5 | 86/3922 | 0.89(0.63-1.25) | 350/3922 | 0.95(0.80-1.12) |
| *P* for trend |  | 0.139 |  | 0.336 |
| **Copper (dinner)** | |  |  |  |
| Q1 | 82/3091 | 1 | 372/3091 | 1 |
| Q2 | 119/4989 | 0.89(0.67-1.19) | 541/4989 | 0.93(0.81-1.06) |
| Q3 | 127/6298 | 0.74(0.55-0.99) | 602/6298 | 0.83(0.72-0.95) |
| Q4 | 115/5041 | 0.77(0.57-1.05) | 511/5041 | 0.90(0.78-1.04) |
| Q5 | 77/3162 | 0.80(0.56-1.13) | 283/3162 | 0.79(0.66-0.93) |
| *P* for trend |  | 0.118 |  | 0.011 |

Adjustments included age, sex, ethnicity, income, education level, regular exercise, smoking and drinking status, BMI, prevalence of diabetes, hypertension, hyperlipidemia, nutrient supplement use, AHEI, total daily energy intake and total dietary minerals intake. Q, quartile. HR, hazard ratio.
